# Supplementary material
Source: Research Square preprint supplement (doi:10.21203/rs.3.rs-9173445/v1)
Supplement: Supplementary file 1 [file 0a8d437796da56c8e949c2c4.docx]

**Supplemental Tables 1 and 2**

**Suppl. Table 1**: Samples analyzed in this study with respective crown-to-rump length (CRL) and estimated age.

| **Estimated age (days)** | **Sample number** | **CRL (cm)** |
| --- | --- | --- |
| 45-46 | 2 | 2.5, 3.0 (male) |
| 60 | 2 | 6.0, 6.5 (female) |
| 70 | 2 | 9.0, 9.5 (female) |
| 90 | 5 | 15.5, 16.0, 16.5, 17.5, 17.8 (female) |
| 120 | 3 | 24.1, 27.9, 30.5 (female) |
| 140 | 2 | 33.0, 36.0 (female) |

**Suppl. Table 2:** Primary and secondary antibodies used.

| **Primary Antibodies** | **Manufacturer** | **Catalog number** | **Dilution** |
| --- | --- | --- | --- |
| Goat anti-OCT-3/4 | Novus Biologicals | AF1759 | 1:100 |
| Goat anti-SOX17 | R&D Systems | AF1924 | 1:500 |
| Rat anti-PRDM1 | Invitrogen | 14-5963-80 | 1:50 |
| Goat anti-TFAP2C | R&D Systems | AF5059 | 1:500 |
| Rabbit anti-DDX4 | Abcam | AB13840 | 1:500 |
| Rabbit anti-DAZL | Abcam | AB34139 | 1:500 |
| Mouse anti-CD9 | Invitrogen | MA1-19301 | 1:200 |
| Rabbit anti-cKIT | Invitrogen | PA5-14694 | 1:100 |
|  | | | |
| **Secondary antibodies** | **Manufacturer** | **Catalog number** | **Dilution** |
| Donkey anti-rat AlexaFluor 488 | Invitrogen | A21208 | 1:500 |
| Donkey anti-rabbit AlexaFluor 488 | Invitrogen | A21206 | 1:500 |
| Donkey anti-goat AlexaFluor 568 | Invitrogen | A11057 | 1:500 |
| Rat anti-mouse PE | BD Pharmingen | 559940 | 1:50 |
| Donkey anti-goat AlexaFluor 647 | Invitrogen | A21447 | 1:500 |
